# Supplementary material
Source: publisher site journal article supplement (https://www.dovepress.com/article/390056)
Supplement: Supplementary file 1 [file get_supplementary_file.php]

**Supplementary Data**

**Table S1. *In vivo* distribution of 111In–GdoNP (IT) in HEMC-SS model.**

Biodistribution data of 111In–GdoNP IT injected in NMRI nude mice bearing HEMC-SS xenograft. Results are expressed as the percentage of injected dose per gram of tissue (% ID/g organ, mean ± SEM).

|  | 2 min | | | 10 min | | | 24 h | | |
| --- | --- | --- | --- | --- | --- | --- | --- | --- | --- |
| Cadaver | 2.32 | ± | 0.85 | 2.20 | ± | 0.57 | 1.10 | ± | 0.22 |
| Brain | 0.11 | ± | 0.05 | 0.21 | ± | 0.09 | 0.11 | ± | 0.03 |
| Heart | 0.45 | ± | 0.21 | 1.05 | ± | 0.24 | 0.82 | ± | 0.23 |
| Liver | 0.30 | ± | 0.13 | 0.92 | ± | 0.23 | 4.06 | ± | 5.89 |
| Muscle | 0.13 | ± | 0.07 | 0.36 | ± | 0.09 | 0.40 | ± | 0.14 |
| Bone | 0.25 | ± | 0.08 | 0.62 | ± | 0.13 | 1.13 | ± | 0.26 |
| Skin | 0.21 | ± | 0.09 | 0.90 | ± | 0.21 | 1.85 | ± | 0.37 |
| Lung | 0.63 | ± | 0.32 | 2.10 | ± | 0.55 | 1.45 | ± | 0.35 |
| Spleen | 0.34 | ± | 0.24 | 0.70 | ± | 0.11 | 2.08 | ± | 0.60 |
| Kidney | 1.65 | ± | 0.65 | 15.01 | ± | 4.21 | 43.52 | ± | 12.30 |
| Blood | 1.17 | ± | 0.46 | 3.57 | ± | 1.18 | 1.10 | ± | 0.37 |
| Digest. tract | 0.18 | ± | 0.06 | 0.59 | ± | 0.15 | 0.83 | ± | 0.17 |
| Tumor | 336.23 | ± | 259.93 | 320.59 | ± | 272.78 | 79.14 | ± | 42.79 |
| Knee | 0.46 | ± | 0.37 | 0.84 | ± | 0.22 | 1.75 | ± | 0.24 |
| Gonads | 0.45 | ± | 0.20 | 0.97 | ± | 0.52 | 1.24 | ± | 0.39 |

**Table S2. *In vivo* distribution of 111In–GdoNP (IV) in HEMC-SS model.**

Biodistribution data of 111In–GdoNP IV injected in NMRI nude mice bearing HEMC-SS xenograft. Results are expressed as the percentage of injected dose per gram of tissue (% ID/g organ, mean ± SEM).

|  | 10 min | | | 1 h | | | 24 h | | |
| --- | --- | --- | --- | --- | --- | --- | --- | --- | --- |
| Cadaver | 1.41 | ± | 0.16 | 1.09 | ± | 0.11 | 0.85 | ± | 0.16 |
| Brain | 0.28 | ± | 0.10 | 0.34 | ± | 0.04 | 0.12 | ± | 0.04 |
| Heart | 2.42 | ± | 0.50 | 1.60 | ± | 0.25 | 0.93 | ± | 0.29 |
| Liver | 4.92 | ± | 0.69 | 3.29 | ± | 0.40 | 2.78 | ± | 0.22 |
| Muscle | 1.08 | ± | 0.65 | 0.64 | ± | 0.08 | 0.46 | ± | 0.22 |
| Bone | 1.34 | ± | 0.22 | 1.06 | ± | 0.16 | 1.27 | ± | 0.32 |
| Skin | 2.26 | ± | 0.22 | 1.93 | ± | 0.25 | 2.12 | ± | 0.33 |
| Lung | 3.81 | ± | 0.65 | 3.36 | ± | 0.46 | 1.64 | ± | 0.32 |
| Spleen | 2.30 | ± | 0.66 | 1.96 | ± | 0.39 | 3.19 | ± | 0.49 |
| Kidney | 94.68 | ± | 24.02 | 131.53 | ± | 23.56 | 93.73 | ± | 14.50 |
| Blood | 5.29 | ± | 2.37 | 4.69 | ± | 1.08 | 1.08 | ± | 0.34 |
| Digestive tract | 0.82 | ± | 0.22 | 0.59 | ± | 0.09 | 0.94 | ± | 0.30 |
| Tumor | 1.09 | ± | 0.47 | 1.23 | ± | 0.25 | 2.24 | ± | 1.29 |
| Knee | 1.58 | ± | 0.43 | 1.67 | ± | 0.19 | 2.32 | ± | 0.46 |
| Gonads | 1.79 | ± | 0.72 | 1.71 | ± | 0.74 | 1.60 | ± | 0.72 |
